# Supplementary material for: Construction Immune Related Feed-Forward Loop Network Reveals Angiotensin II Receptor Blocker as Potential Neuroprotective Drug for Ischemic Stroke
Source: Front Genet. 2022 Mar 28;13:811571. doi: 10.3389/fgene.2022.811571 (PMC8995882; doi:10.3389/fgene.2022.811571)
Supplement: Supplementary file 6 [file Table5.DOCX]

**Table 51 Detail information of drug-gene pairs, drug-TF pairs and drug-TF&gene pairs.**

| Catagory | Name | Drug name |
| --- | --- | --- |
| Gene | CXCR4 | Plerixafor |
| FGF2 | Sucralfate |
| FGF2 | Pentosan Polysulfate |
| FGF2 | Sirolimus |
| IL6 | Siltuximab |
| VEGFA | Bevacizumab |
| VEGFA | Ranibizumab |
| VEGFA | Dalteparin |
| VEGFA | Aflibercept |
| AGTR1 | Valsartan |
| AGTR1 | Olmesartan |
| AGTR1 | Losartan |
| AGTR1 | Candesartan cilexetil |
| AGTR1 | Eprosartan |
| AGTR1 | Telmisartan |
| AGTR1 | Irbesartan |
| AGTR1 | Tasosartan |
| AGTR1 | Azilsartan medoxomil |
| AGTR1 | Fimasartan |
| AGTR1 | Angiotensin II |
| TF&gene | ESR1 | Conjugated estrogens |
| ESR1 | Tamoxifen |
| ESR1 | Raloxifene |
| ESR1 | Toremifene |
| ESR1 | Medroxyprogesterone acetate |
| ESR1 | Fulvestrant |
| ESR1 | Norgestimate |
| ESR1 | Estramustine |
| ESR1 | Tibolone |
| ESR1 | Fluoxymesterone |
| ESR1 | Trilostane |
| ESR1 | Ethynodiol diacetate |
| ESR1 | Ethinyl Estradiol |
| ESR1 | Estradiol |
| ESR1 | Polyestradiol phosphate |
| ESR1 | Estradiol acetate |
| ESR1 | Estradiol benzoate |
| ESR1 | Estradiol cypionate |
| ESR1 | Estradiol dienanthate |
| ESR1 | Estradiol valerate |
| ESR1 | Estrone sulfate |
| ESR1 | Synthetic Conjugated Estrogens, A |
| ESR1 | Synthetic Conjugated Estrogens, B |
| ESR1 | Bazedoxifene |
| ESR1 | Lasofoxifene |
| ESR1 | Mestranol |
| ESR1 | Danazol |
| ESR1 | Quinestrol |
| ESR1 | Ospemifene |
| ESR1 | Estrone |
| ESR1 | Dienestrol |
| ESR1 | Estriol |
| ESR1 | Clomifene |
| ESR1 | Etonogestrel |
| ESR1 | Desogestrel |
| ESR1 | Progesterone |
| ESR1 | Diethylstilbestrol |
| ESR1 | Levonorgestrel |
